# Supplementary material for: Prospective Evaluation of Quality of Life and Functional Outcomes after Carbon Ion Radiotherapy for Inoperable Bone and Soft Tissue Sarcomas
Source: MDPI journal article supplement (doi:10.3390/cancers13112591), 2021-05-25
Supplement: s1 [file s1]

## Supplementary Materilas

**Table S1.** Late adverse events graded by CTCAE, version 4.0.

| Late Adverse Events           | Grade 1 | Grade 2 | Grade 3 |
|-------------------------------|---------|---------|---------|
| Dermatitis                    | 27      | 6       | 0       |
| Peripheral sensory neuropathy | 22      | 9       | 0       |
| Peripheral motor neuropathy   | 8       | 2       | 0       |
| Genitourinary                 | 4       | 2       | 0       |
| Edema                         | 5       | 0       | 0       |
| Gastrointestinal              | 2       | 0       | 0       |
| Bone infection                | 0       | 0       | 1       |

CTCAE, Common Terminology Criteria for Adverse Events.

**Table S2.** MSTs and QOL from other published studies regarding BSTS.

| Study                                           | Tx. Modality                                    | No. of Pt. | MSTS, Pre- to Post-tx. | Physical Component of Health-Related QOL, Pre- to Post-tx. (QOL Questionnaire) | Mental Component of Health-Related QOL, Pre- to Post-tx. (QOL Questionnaire) |
|-------------------------------------------------|-------------------------------------------------|------------|------------------------|--------------------------------------------------------------------------------|------------------------------------------------------------------------------|
| Rivard et al. 2015 Ann. Surg. Oncol. [18]       | Surgery + preoperative photon radiotherapy      | 52         | 31.4 to 33.6           | 40.6 to 45.1 (SF-36)                                                           | 49.4 to 53.1 (SF-36)                                                         |
| Davis et al. 2002 JCO. [29]                     | Surgery + pre/postoperative photon radiotherapy | 187        | 27.1 to 28.2           | 68.7 to 66.6<br>71.7 to 63.9 (SF-36)                                           | 70.2 to 78.3<br>62.0 to 75.8 (SF-36)                                         |
| Davidge et al. 2009 J. Surg. Oncol [30]         | Surgery                                         | 157        | 31.1 to 31.1           | NA                                                                             | NA                                                                           |
| Leiser et al. 2016 Radiother. Oncol. [13]       | Proton radiotherapy                             | 83         | NA                     | 66.5 to 70.9 (PedQoL)                                                          | 74.6 to 74.9 (PedQoL)                                                        |
| Coens et al. 2015 Cancer [36]                   | Chemotherapy                                    | 369        | NA                     | 64.1 to 57.3 (EORTC QLQ-C30)                                                   |                                                                              |
| Hidetatsu et al. 2016 Int. J. Clin. Oncol. [10] | CIRT                                            | 7          | NA to 26               | NA                                                                             | NA                                                                           |
| Nishida et al. 2011 IJROBP. [26]                | CIRT                                            | 10         | NA to 22               | NA                                                                             | NA                                                                           |
| Current study                                   | CIRT                                            | 61         | 20.0 to 20.9           | 41.0 to 40.1 (SF-8)                                                            | 43.75 to 50.3 (SF-8)                                                         |

Abbreviations: MSTS = Musculoskeletal Tumor Society; QOL = Quality of life; NA = not applicable; Tx. = Treatment.
